# Supplementary material for: Nutritional and Biological Evaluation of Leaves of Mangifera indica from Mauritius
Source: Hindawi journal article supplement (doi:10.1155/2018/6869294), 2018-08-01
Supplement: f1 [file 6869294.f1.docx]

The mass spectra data in the positive ion and modes used to support the findings of this study are included within the supplementary information file(s).
